# Supplementary material
Source: Springer Nature journal article supplement (https://www.springermedizin.de/resource/supplementary/12985_2014_2437_MOESM7_ESM.pdf/9606722)

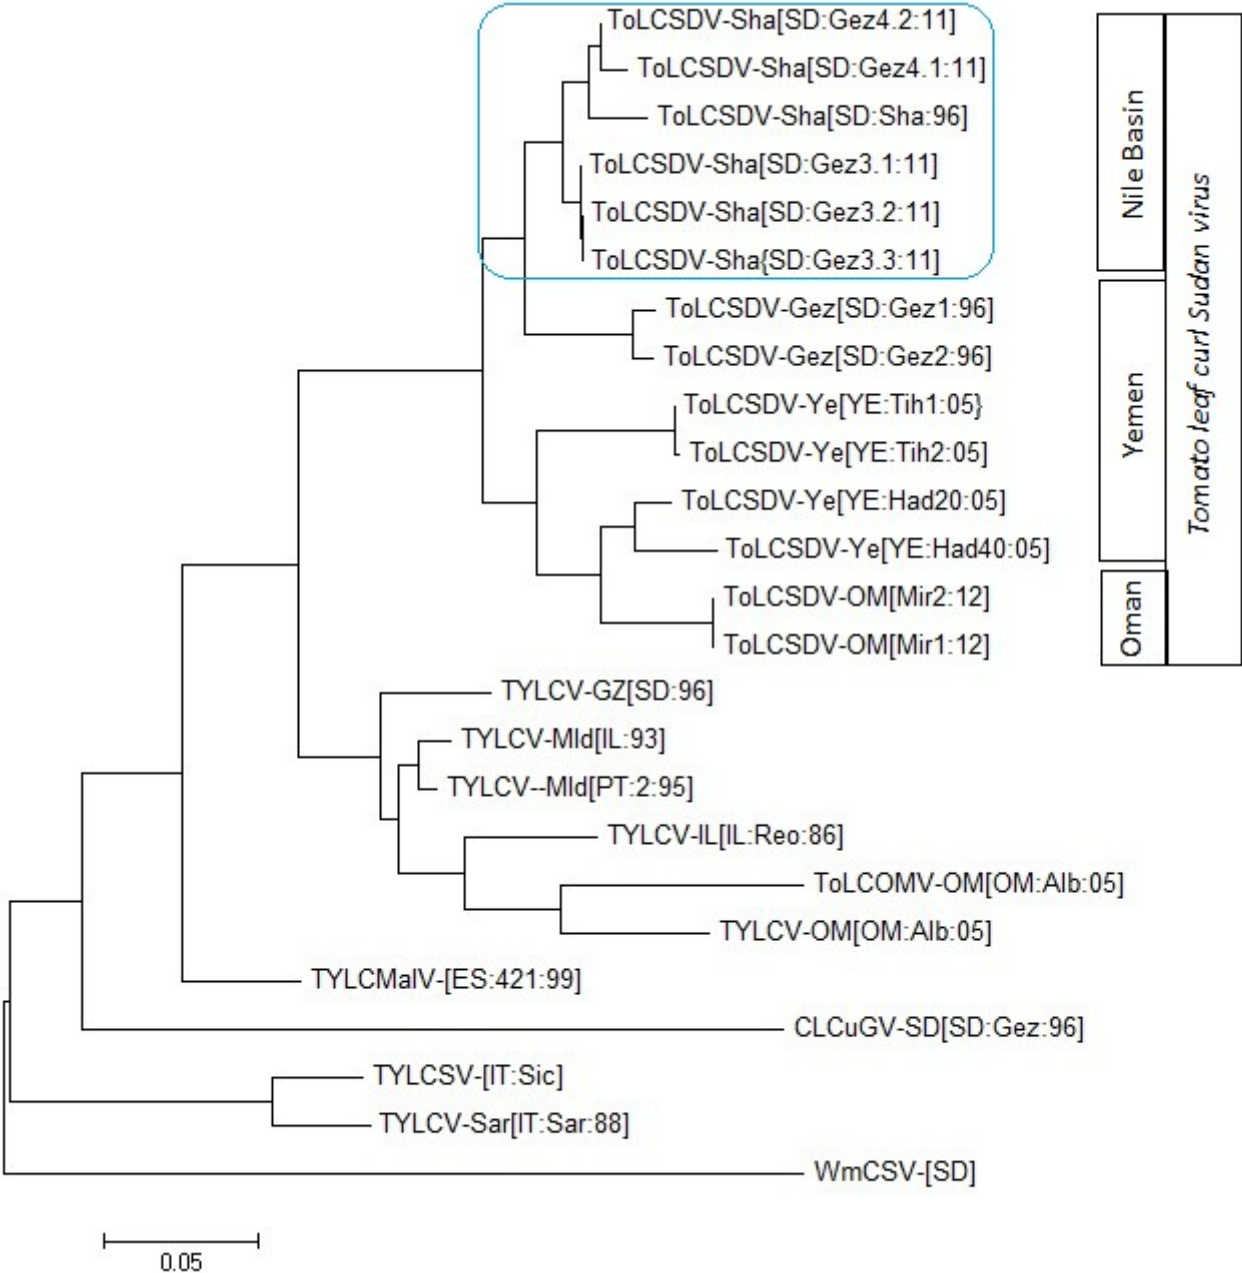

Supplement: MOESM7 [file 9606722]
